# Supplementary material for: Spatial and Host-Related Variation in Prevalence and Population Density of Wheat Curl Mite (Aceria tosichella) Cryptic Genotypes in Agricultural Landscapes
Source: PubMed Central journal article supplement (PMC5242520; doi:10.1371/journal.pone.0169874), 2017-01-18

S1 Fig

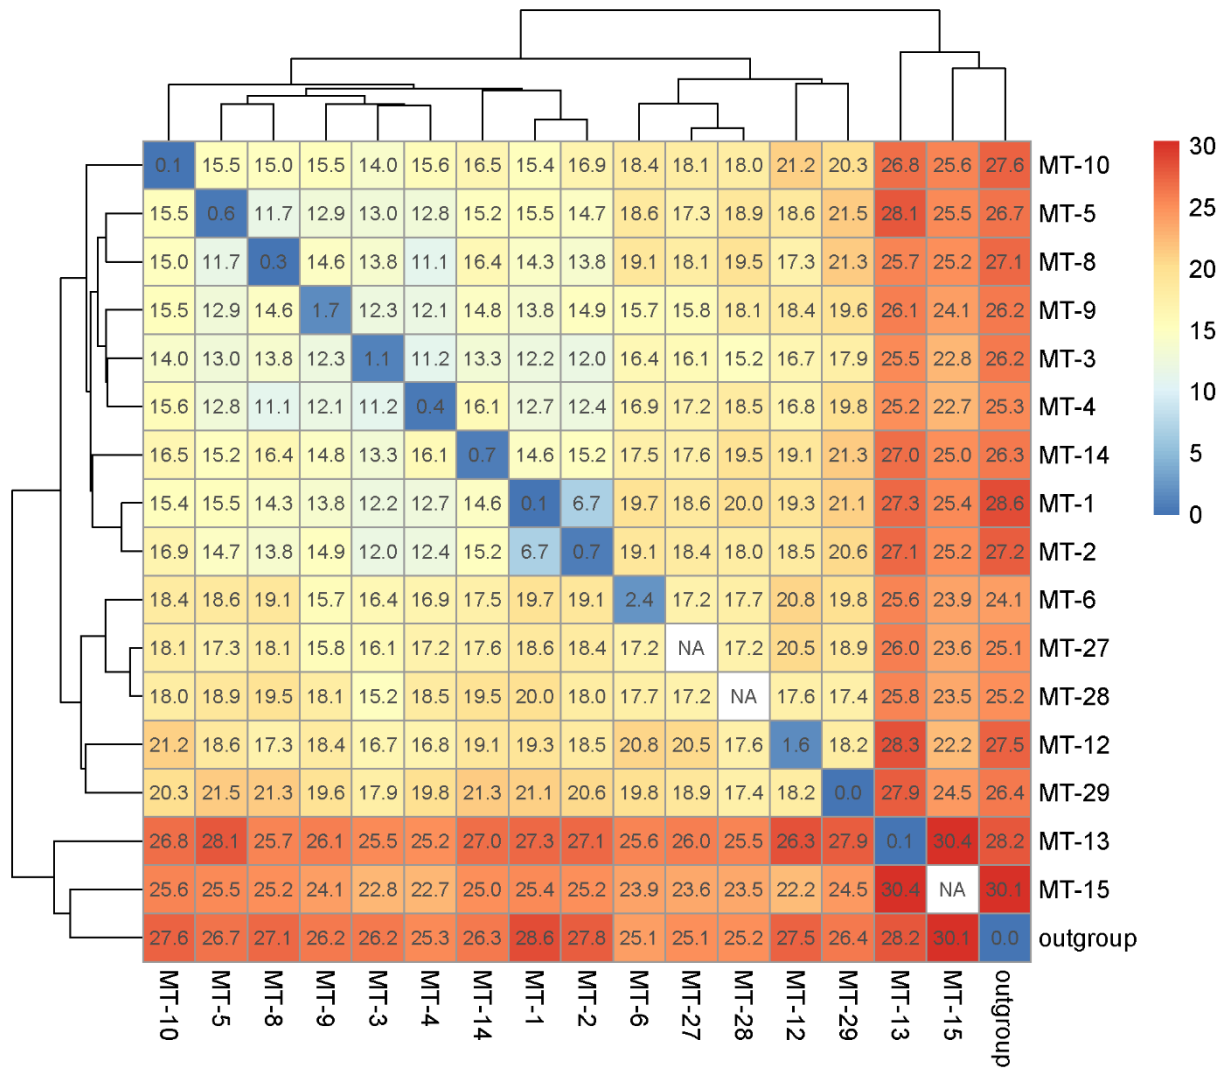

Supplement: pone.0169874.s001.pdf [file pone.0169874.s001.pdf]
