# Supplementary material for: Spatial and Host-Related Variation in Prevalence and Population Density of Wheat Curl Mite (Aceria tosichella) Cryptic Genotypes in Agricultural Landscapes
Source: PubMed Central journal article supplement (PMC5242520; doi:10.1371/journal.pone.0169874), 2017-01-18
Supplement: pone.0169874.s003.pdf [file pone.0169874.s003.pdf]

**S1 Table**

| WCM Lineage | Host plant species | n    | k   | P     | 95% CI      | I     | 95% CI       | D    | 95% CI    |
|-------------|--------------------|------|-----|-------|-------------|-------|--------------|------|-----------|
| MT-1        | wheat              | 1641 | 38  | 2.32  | 1.66–3.12   | 91.29 | 37.71–154.92 | 2.11 | 0.78–3.85 |
|             | quackgrass         | 3659 | 39  | 1.07  | 0.77–1.43   | 11.15 | 6.56–17.67   | 0.12 | 0.06–0.20 |
|             | triticale          | 1531 | 15  | 0.98  | 0.57–1.56   | 18.87 | 11.73–26.40  | 0.18 | 0.08–0.31 |
|             | barley             | 447  | 3   | 0.67  | 0.17–1.73   | 19.33 | 4.00–43.00   | 0.13 | 0.00–0.36 |
|             | rye                | 509  | 0   | 0.00  | 0.00–0.66   | 0.00  | 0.00–0.00    | 0.00 | 0.00–0.00 |
|             | smooth brome       | 651  | 0   | 0.00  | 0.00–0.52   | 0.00  | 0.00–0.00    | 0.00 | 0.00–0.00 |
|             | oats               | 716  | 0   | 0.00  | 0.00–0.47   | 0.00  | 0.00–0.00    | 0.00 | 0.00–0.00 |
|             | tall oat-grass     | 1811 | 0   | 0.00  | 0.00–0.19   | 0.00  | 0.00–0.00    | 0.00 | 0.00–0.00 |
| MT-2        | quackgrass         | 3659 | 32  | 0.87  | 0.61–1.21   | 11.72 | 6.28–19.78   | 0.10 | 0.05–0.18 |
|             | wheat              | 1641 | 1   | 0.06  | 0.00–0.27   | 17.00 | 0.00–0.00    | 0.01 | 0.00–0.03 |
|             | barley             | 447  | 0   | 0.00  | 0.00–0.75   | 0.00  | 0.00–0.00    | 0.00 | 0.00–0.00 |
|             | rye                | 509  | 0   | 0.00  | 0.00–0.66   | 0.00  | 0.00–0.00    | 0.00 | 0.00–0.00 |
|             | smooth brome       | 651  | 0   | 0.00  | 0.00–0.52   | 0.00  | 0.00–0.00    | 0.00 | 0.00–0.00 |
|             | oats               | 716  | 0   | 0.00  | 0.00–0.47   | 0.00  | 0.00–0.00    | 0.00 | 0.00–0.00 |
|             | triticale          | 1531 | 0   | 0.00  | 0.00–0.22   | 0.00  | 0.00–0.00    | 0.00 | 0.00–0.00 |
|             | tall oat-grass     | 1811 | 0   | 0.00  | 0.00–0.19   | 0.00  | 0.00–0.00    | 0.00 | 0.00–0.00 |
| MT-3        | quackgrass         | 3659 | 900 | 24.60 | 23.22–26.01 | 29.45 | 25.92–33.14  | 7.24 | 6.28–8.27 |
|             | triticale          | 1531 | 73  | 4.77  | 3.78–5.91   | 34.82 | 19.74–53.82  | 1.66 | 0.87–2.66 |
|             | wheat              | 1641 | 74  | 4.51  | 3.58–5.59   | 14.42 | 8.16–24.09   | 0.65 | 0.34–1.11 |
|             | barley             | 447  | 5   | 1.12  | 0.40–2.39   | 1.20  | 1.00–1.60    | 0.01 | 0.00–0.03 |
|             | smooth brome       | 651  | 3   | 0.46  | 0.12–1.19   | 4.67  | 1.00–7.00    | 0.02 | 0.00–0.05 |
|             | tall oat-grass     | 1811 | 3   | 0.17  | 0.04–0.43   | 14.33 | 12.00–16.00  | 0.02 | 0.00–0.06 |
|             | oats               | 716  | 1   | 0.14  | 0.01–0.61   | 1.00  | 0.00–0.00    | 0.00 | 0.00–0.00 |
|             | rye                | 509  | 0   | 0.00  | 0.00–0.66   | 0.00  | 0.00–0.00    | 0.00 | 0.00–0.00 |
| MT-4        | quackgrass         | 3659 | 35  | 0.96  | 0.67–1.31   | 21.89 | 14.2–30.83   | 0.21 | 0.11–0.33 |
|             | wheat              | 1641 | 1   | 0.06  | 0.00–0.27   | 8.00  | 0.00–0.00    | 0.00 | 0.00–0.01 |
|             | barley             | 447  | 0   | 0.00  | 0.00–0.75   | 0.00  | 0.00–0.00    | 0.00 | 0.00–0.00 |
|             | rye                | 509  | 0   | 0.00  | 0.00–0.66   | 0.00  | 0.00–0.00    | 0.00 | 0.00–0.00 |
|             | smooth brome       | 651  | 0   | 0.00  | 0.00–0.52   | 0.00  | 0.00–0.00    | 0.00 | 0.00–0.00 |
|             | oats               | 716  | 0   | 0.00  | 0.00–0.47   | 0.00  | 0.00–0.00    | 0.00 | 0.00–0.00 |
|             | triticale          | 1531 | 0   | 0.00  | 0.00–0.22   | 0.00  | 0.00–0.00    | 0.00 | 0.00–0.00 |
|             | tall oat-grass     | 1811 | 0   | 0.00  | 0.00–0.19   | 0.00  | 0.00–0.00    | 0.00 | 0.00–0.00 |
| MT-5        | tall oat-grass     | 1811 | 146 | 8.06  | 6.87–9.38   | 10.49 | 8.2–13.08    | 0.85 | 0.62–1.09 |
|             | barley             | 447  | 0   | 0.00  | 0.00–0.75   | 0.00  | 0.00–0.00    | 0.00 | 0.00–0.00 |
|             | rye                | 509  | 0   | 0.00  | 0.00–0.66   | 0.00  | 0.00–0.00    | 0.00 | 0.00–0.00 |
|             | smooth brome       | 651  | 0   | 0.00  | 0.00–0.52   | 0.00  | 0.00–0.00    | 0.00 | 0.00–0.00 |
|             | oats               | 716  | 0   | 0.00  | 0.00–0.47   | 0.00  | 0.00–0.00    | 0.00 | 0.00–0.00 |
|             | triticale          | 1531 | 0   | 0.00  | 0.00–0.22   | 0.00  | 0.00–0.00    | 0.00 | 0.00–0.00 |
|             | wheat              | 1641 | 0   | 0.00  | 0.00–0.21   | 0.00  | 0.00–0.00    | 0.00 | 0.00–0.00 |
|             | quackgrass         | 3659 | 0   | 0.00  | 0.00–0.09   | 0.00  | 0.00–0.00    | 0.00 | 0.00–0.00 |

S1 Table continued

| WCM Lineage | Host plant species | n    | k   | P     | 95% CI      | I     | 95% CI      | D    | 95% CI    |
|-------------|--------------------|------|-----|-------|-------------|-------|-------------|------|-----------|
| MT-6        | quackgrass         | 3659 | 25  | 0.68  | 0.45–0.99   | 11.84 | 7.72–16.52  | 0.08 | 0.04–0.13 |
|             | barley             | 447  | 0   | 0.00  | 0.00–0.75   | 0.00  | 0.00–0.00   | 0.00 | 0.00–0.00 |
|             | rye                | 509  | 0   | 0.00  | 0.00–0.66   | 0.00  | 0.00–0.00   | 0.00 | 0.00–0.00 |
|             | smooth brome       | 651  | 0   | 0.00  | 0.00–0.52   | 0.00  | 0.00–0.00   | 0.00 | 0.00–0.00 |
|             | oats               | 716  | 0   | 0.00  | 0.00–0.47   | 0.00  | 0.00–0.00   | 0.00 | 0.00–0.00 |
|             | triticale          | 1531 | 0   | 0.00  | 0.00–0.22   | 0.00  | 0.00–0.00   | 0.00 | 0.00–0.00 |
|             | wheat              | 1641 | 0   | 0.00  | 0.00–0.21   | 0.00  | 0.00–0.00   | 0.00 | 0.00–0.00 |
|             | tall oat-grass     | 1811 | 0   | 0.00  | 0.00–0.19   | 0.00  | 0.00–0.00   | 0.00 | 0.00–0.00 |
| MT-8        | wheat              | 1641 | 219 | 13.35 | 11.76–15.05 | 34.93 | 27.66–43.56 | 4.66 | 3.56–5.98 |
|             | triticale          | 1531 | 60  | 3.92  | 3.02–4.97   | 26.98 | 17.77–37.78 | 1.06 | 0.64–1.56 |
|             | quackgrass         | 3659 | 89  | 2.43  | 1.97–2.97   | 17.01 | 11.04–24.52 | 0.41 | 0.25–0.62 |
|             | tall oat-grass     | 1811 | 21  | 1.16  | 0.73–1.72   | 5.57  | 3.76–7.38   | 0.06 | 0.03–0.10 |
|             | smooth brome       | 651  | 7   | 1.08  | 0.46–2.07   | 6.29  | 3.14–9.29   | 0.07 | 0.02–0.13 |
|             | oats               | 716  | 5   | 0.70  | 0.25–1.49   | 5.40  | 2.00–10.80  | 0.04 | 0.00–0.09 |
|             | barley             | 447  | 3   | 0.67  | 0.17–1.73   | 9.67  | 6.00–13.00  | 0.06 | 0.00–0.15 |
|             | rye                | 509  | 3   | 0.59  | 0.15–1.52   | 8.33  | 6.00–12.00  | 0.05 | 0.00–0.11 |
| MT-9        | smooth brome       | 651  | 176 | 27.04 | 23.72–30.53 | 17.10 | 12.63–22.69 | 4.62 | 3.27–6.24 |
|             | barley             | 447  | 0   | 0.00  | 0.00–0.75   | 0.00  | 0.00–0.00   | 0.00 | 0.00–0.00 |
|             | rye                | 509  | 0   | 0.00  | 0.00–0.66   | 0.00  | 0.00–0.00   | 0.00 | 0.00–0.00 |
|             | oats               | 716  | 0   | 0.00  | 0.00–0.47   | 0.00  | 0.00–0.00   | 0.00 | 0.00–0.00 |
|             | triticale          | 1531 | 0   | 0.00  | 0.00–0.22   | 0.00  | 0.00–0.00   | 0.00 | 0.00–0.00 |
|             | wheat              | 1641 | 0   | 0.00  | 0.00–0.21   | 0.00  | 0.00–0.00   | 0.00 | 0.00–0.00 |
|             | tall oat-grass     | 1811 | 0   | 0.00  | 0.00–0.19   | 0.00  | 0.00–0.00   | 0.00 | 0.00–0.00 |
|             | quackgrass         | 3659 | 0   | 0.00  | 0.00–0.09   | 0.00  | 0.00–0.00   | 0.00 | 0.00–0.00 |
| MT-10       | smooth brome       | 651  | 22  | 3.38  | 2.17–4.95   | 13.05 | 9.36–16.95  | 0.44 | 0.24–0.68 |
|             | barley             | 447  | 0   | 0.00  | 0.00–0.75   | 0.00  | 0.00–0.00   | 0.00 | 0.00–0.00 |
|             | rye                | 509  | 0   | 0.00  | 0.00–0.66   | 0.00  | 0.00–0.00   | 0.00 | 0.00–0.00 |
|             | oats               | 716  | 0   | 0.00  | 0.00–0.47   | 0.00  | 0.00–0.00   | 0.00 | 0.00–0.00 |
|             | triticale          | 1531 | 0   | 0.00  | 0.00–0.22   | 0.00  | 0.00–0.00   | 0.00 | 0.00–0.00 |
|             | wheat              | 1641 | 0   | 0.00  | 0.00–0.21   | 0.00  | 0.00–0.00   | 0.00 | 0.00–0.00 |
|             | tall oat-grass     | 1811 | 0   | 0.00  | 0.00–0.19   | 0.00  | 0.00–0.00   | 0.00 | 0.00–0.00 |
|             | quackgrass         | 3659 | 0   | 0.00  | 0.00–0.09   | 0.00  | 0.00–0.00   | 0.00 | 0.00–0.00 |
| MT-12       | tall oat-grass     | 1811 | 6   | 0.33  | 0.13–0.67   | 9.67  | 6.83–12.67  | 0.03 | 0.01–0.06 |
|             | quackgrass         | 3659 | 6   | 0.16  | 0.07–0.33   | 8.67  | 3.17–14.33  | 0.01 | 0.00–0.03 |
|             | barley             | 447  | 0   | 0.00  | 0.00–0.75   | 0.00  | 0.00–0.00   | 0.00 | 0.00–0.00 |
|             | rye                | 509  | 0   | 0.00  | 0.00–0.66   | 0.00  | 0.00–0.00   | 0.00 | 0.00–0.00 |
|             | smooth brome       | 651  | 0   | 0.00  | 0.00–0.52   | 0.00  | 0.00–0.00   | 0.00 | 0.00–0.00 |
|             | oats               | 716  | 0   | 0.00  | 0.00–0.47   | 0.00  | 0.00–0.00   | 0.00 | 0.00–0.00 |
|             | triticale          | 1531 | 0   | 0.00  | 0.00–0.22   | 0.00  | 0.00–0.00   | 0.00 | 0.00–0.00 |
|             | wheat              | 1641 | 0   | 0.00  | 0.00–0.21   | 0.00  | 0.00–0.00   | 0.00 | 0.00–0.00 |
| MT-13       | quackgrass         | 3659 | 26  | 0.71  | 0.47–1.02   | 12.31 | 6.23–20.08  | 0.09 | 0.04–0.16 |
|             | tall oat-grass     | 1811 | 3   | 0.17  | 0.04–0.43   | 2.33  | 1.00–5.00   | 0.00 | 0.00–0.01 |
|             | barley             | 447  | 0   | 0.00  | 0.00–0.75   | 0.00  | 0.00–0.00   | 0.00 | 0.00–0.00 |
|             | rye                | 509  | 0   | 0.00  | 0.00–0.66   | 0.00  | 0.00–0.00   | 0.00 | 0.00–0.00 |
|             | smooth brome       | 651  | 0   | 0.00  | 0.00–0.52   | 0.00  | 0.00–0.00   | 0.00 | 0.00–0.00 |
|             | oats               | 716  | 0   | 0.00  | 0.00–0.47   | 0.00  | 0.00–0.00   | 0.00 | 0.00–0.00 |
|             | triticale          | 1531 | 0   | 0.00  | 0.00–0.22   | 0.00  | 0.00–0.00   | 0.00 | 0.00–0.00 |
|             | wheat              | 1641 | 0   | 0.00  | 0.00–0.21   | 0.00  | 0.00–0.00   | 0.00 | 0.00–0.00 |

S1 Table continued

| WCM Lineage | Host plant species | n    | k | P    | 95% CI    | I      | 95% CI     | D    | 95% CI    |
|-------------|--------------------|------|---|------|-----------|--------|------------|------|-----------|
| MT-14       | smooth brome       | 651  | 6 | 0.92 | 0.37–1.86 | 17.50  | 9.00–25.83 | 0.16 | 0.03–0.33 |
|             | barley             | 447  | 0 | 0.00 | 0.00–0.75 | 0.00   | 0.00–0.00  | 0.00 | 0.00–0.00 |
|             | rye                | 509  | 0 | 0.00 | 0.00–0.66 | 0.00   | 0.00–0.00  | 0.00 | 0.00–0.00 |
|             | oats               | 716  | 0 | 0.00 | 0.00–0.47 | 0.00   | 0.00–0.00  | 0.00 | 0.00–0.00 |
|             | triticale          | 1531 | 0 | 0.00 | 0.00–0.22 | 0.00   | 0.00–0.00  | 0.00 | 0.00–0.00 |
|             | wheat              | 1641 | 0 | 0.00 | 0.00–0.21 | 0.00   | 0.00–0.00  | 0.00 | 0.00–0.00 |
|             | tall oat-grass     | 1811 | 0 | 0.00 | 0.00–0.19 | 0.00   | 0.00–0.00  | 0.00 | 0.00–0.00 |
|             | quackgrass         | 3659 | 0 | 0.00 | 0.00–0.09 | 0.00   | 0.00–0.00  | 0.00 | 0.00–0.00 |
| MT-15       | wheat              | 1641 | 1 | 0.06 | 0.00–0.27 | 13.00  | 0.00–0.00  | 0.01 | 0.00–0.02 |
|             | barley             | 447  | 0 | 0.00 | 0.00–0.75 | 0.00   | 0.00–0.00  | 0.00 | 0.00–0.00 |
|             | rye                | 509  | 0 | 0.00 | 0.00–0.66 | 0.00   | 0.00–0.00  | 0.00 | 0.00–0.00 |
|             | smooth brome       | 651  | 0 | 0.00 | 0.00–0.52 | 0.00   | 0.00–0.00  | 0.00 | 0.00–0.00 |
|             | oats               | 716  | 0 | 0.00 | 0.00–0.47 | 0.00   | 0.00–0.00  | 0.00 | 0.00–0.00 |
|             | triticale          | 1531 | 0 | 0.00 | 0.00–0.22 | 0.00   | 0.00–0.00  | 0.00 | 0.00–0.00 |
|             | tall oat-grass     | 1811 | 0 | 0.00 | 0.00–0.19 | 0.00   | 0.00–0.00  | 0.00 | 0.00–0.00 |
|             | quackgrass         | 3659 | 0 | 0.00 | 0.00–0.09 | 0.00   | 0.00–0.00  | 0.00 | 0.00–0.00 |
| MT-27       | wheat              | 1641 | 2 | 0.12 | 0.02–0.38 | 3.50   | 3.00–4.00  | 0.00 | 0.00–0.01 |
|             | barley             | 447  | 0 | 0.00 | 0.00–0.75 | 0.00   | 0.00–0.00  | 0.00 | 0.00–0.00 |
|             | rye                | 509  | 0 | 0.00 | 0.00–0.66 | 0.00   | 0.00–0.00  | 0.00 | 0.00–0.00 |
|             | smooth brome       | 651  | 0 | 0.00 | 0.00–0.52 | 0.00   | 0.00–0.00  | 0.00 | 0.00–0.00 |
|             | oats               | 716  | 0 | 0.00 | 0.00–0.47 | 0.00   | 0.00–0.00  | 0.00 | 0.00–0.00 |
|             | triticale          | 1531 | 0 | 0.00 | 0.00–0.22 | 0.00   | 0.00–0.00  | 0.00 | 0.00–0.00 |
|             | tall oat-grass     | 1811 | 0 | 0.00 | 0.00–0.19 | 0.00   | 0.00–0.00  | 0.00 | 0.00–0.00 |
|             | quackgrass         | 3659 | 0 | 0.00 | 0.00–0.09 | 0.00   | 0.00–0.00  | 0.00 | 0.00–0.00 |
| MT-28       | tall oat-grass     | 1811 | 1 | 0.06 | 0.00–0.24 | 5.00   | 0.00–0.00  | 0.00 | 0.00–0.01 |
|             | barley             | 447  | 0 | 0.00 | 0.00–0.75 | 0.00   | 0.00–0.00  | 0.00 | 0.00–0.00 |
|             | rye                | 509  | 0 | 0.00 | 0.00–0.66 | 0.00   | 0.00–0.00  | 0.00 | 0.00–0.00 |
|             | smooth brome       | 651  | 0 | 0.00 | 0.00–0.52 | 0.00   | 0.00–0.00  | 0.00 | 0.00–0.00 |
|             | oats               | 716  | 0 | 0.00 | 0.00–0.47 | 0.00   | 0.00–0.00  | 0.00 | 0.00–0.00 |
|             | triticale          | 1531 | 0 | 0.00 | 0.00–0.22 | 0.00   | 0.00–0.00  | 0.00 | 0.00–0.00 |
|             | wheat              | 1641 | 0 | 0.00 | 0.00–0.21 | 0.00   | 0.00–0.00  | 0.00 | 0.00–0.00 |
|             | quackgrass         | 3659 | 0 | 0.00 | 0.00–0.09 | 0.00   | 0.00–0.00  | 0.00 | 0.00–0.00 |
| MT-29       | tall oat-grass     | 1811 | 1 | 0.06 | 0.00–0.24 | 164.00 | 0.00–0.00  | 0.09 | 0.00–0.27 |
|             | barley             | 447  | 0 | 0.00 | 0.00–0.75 | 0.00   | 0.00–0.00  | 0.00 | 0.00–0.00 |
|             | rye                | 509  | 0 | 0.00 | 0.00–0.66 | 0.00   | 0.00–0.00  | 0.00 | 0.00–0.00 |
|             | smooth brome       | 651  | 0 | 0.00 | 0.00–0.52 | 0.00   | 0.00–0.00  | 0.00 | 0.00–0.00 |
|             | oats               | 716  | 0 | 0.00 | 0.00–0.47 | 0.00   | 0.00–0.00  | 0.00 | 0.00–0.00 |
|             | triticale          | 1531 | 0 | 0.00 | 0.00–0.22 | 0.00   | 0.00–0.00  | 0.00 | 0.00–0.00 |
|             | wheat              | 1641 | 0 | 0.00 | 0.00–0.21 | 0.00   | 0.00–0.00  | 0.00 | 0.00–0.00 |
|             | quackgrass         | 3659 | 0 | 0.00 | 0.00–0.09 | 0.00   | 0.00–0.00  | 0.00 | 0.00–0.00 |
